# Supplementary material for: A bibliometrics analysis and visualization of autism spectrum disorder
Source: Front Psychiatry. 2022 Jul 18;13:884600. doi: 10.3389/fpsyt.2022.884600 (PMC9339633; doi:10.3389/fpsyt.2022.884600)
Supplement: Supplementary file 1 [file Table_1.XLSX]

## Sheet: Year
Year	Count
1998	177
1999	229
2000	239
2001	305
2002	379
2003	424
2004	499
2005	566
2006	696
2007	768
2008	979
2009	1116
2010	1480
2011	1575
2012	1848
2013	2195
2014	2479
2015	2662
2016	2904
2017	3211
2018	3510
2019	3747
2020	4241
2021	4368
	40597

## Sheet: author
Count	Centrality	Year	Author
232	0.01	2006	SIMON BARONCOHEN
170	0	2007	CHRISTOPHER GILLBERG
145	0.11	2007	STEPHEN W SCHERER
132	0.15	2007	JOSEPH D BUXBAUM
129	0.01	2006	CATHERINE LORD
126	0.02	2007	LONNIE ZWAIGENBAUM
124	0.03	2007	TONY CHARMAN
119	0.05	2007	DANIEL H GESCHWIND
118	0.03	2010	EVDOKIA ANAGNOSTOU
104	0	2013	PAUL LICHTENSTEIN
103	0.03	2010	JAN K BUITELAAR
102	0.02	2008	IRVA HERTZPICCIOTTO
99	0.11	2007	PETER SZATMARI
99	0.05	2010	EVAN E EICHLER
94	0	2013	SVEN BOLTE
91	0	2010	THOMAS BOURGERON
90	0	2006	FRANCESCA HAPPE
88	0.04	2007	GERALDINE DAWSON
86	0	2010	ROBERT T SCHULTZ
77	0	2013	MUSTAFA SAHIN
70	0	2013	FILIPPO MURATORI
66	0.02	2010	RICHARD DELORME
59	0	2016	JASON P LERCH
57	0.05	2016	RAPHAEL A BERNIER
57	0.01	2010	JILL A ROSENFELD
56	0.06	2016	MENGCHUAN LAI
55	0.08	2007	JAMES S SUTCLIFFE
53	0.01	2007	HENRIK ANCKARSATER
53	0	2016	HENRIK LARSSON
53	0	2007	JOSEPH PIVEN
51	0.03	2007	MARION LEBOYER
51	0.01	2016	KUN XIA
51	0	2007	PAUL ASHWOOD
49	0	2007	ERIC FOMBONNE
48	0	2016	RICHARD E FRYE
47	0	2016	MITSURU KIKUCHI
47	0	2007	PAOLO CURATOLO
47	0	2007	CHRISTOPHER J MCDOUGLE
47	0	2016	SALEH A BAKHEET
47	0	1998	C GILLBERG
47	0	2016	AHMED NADEEM
47	0	2016	ANDREW J O WHITEHOUSE
45	0	2007	LAURENT MOTTRON
45	0	2016	SABRY M ATTIA
45	0	2016	SUSAN SHURFEN GAU
44	0.05	2013	CHRISTINE ECKER
43	0	2013	MICHAEL J OWEN
43	0	1998	E COURCHESNE
42	0	2007	LISA A CROEN
40	0.11	2010	CHRISTIAN R MARSHALL
40	0	2013	BHISMADEV CHAKRABARTI
39	0	2013	SEBASTIAN LUNDSTROM
39	0	1998	EH COOK
38	0	2007	NANCY J MINSHEW
34	0	2019	BORIS KEREN
33	0	2017	MARGHERITA SALERNO
32	0.01	1998	CJ MCDOUGLE
32	0	2017	GABRIELE TRIPI
32	0	1998	S BARONCOHEN
31	0.02	2007	MARIA RASTAM
31	0	2007	JUDY VAN DE WATER
30	0	2010	CHRISTINE M FREITAG
30	0	2019	EMILY J H JONES
30	0	2007	FLORA TASSONE
30	0	2010	JOHNNY L MATSON
30	0	2007	HELEN TAGERFLUSBERG
30	0	2017	AGATA MALTESE
30	0	2017	PALMIRA ROMANO
29	0.12	2007	CATALINA BETANCUR
29	0.01	2007	EMILY SIMONOFF
29	0	1998	C BARTHELEMY
28	0.01	2013	STEPHAN J SANDERS
28	0	2007	KAZUHIKO NAKAMURA
28	0	2007	NORIO MORI
27	0	2019	MAYADA ELSABBAGH
27	0	2019	WENDY K CHUNG
27	0	2016	GEIR BJORKLUND
27	0	2007	JACQUELINE N CRAWLEY
26	0.01	2019	SARA CALDERONI
26	0	2019	SHEIKH F AHMAD
26	0	2019	DECLAN G M MURPHY
26	0	2019	BERTRAND ISIDOR
25	0.01	2019	ELIZABETH BERRYKRAVIS
25	0.01	2008	ISAAC N PESSAH
25	0	2019	JOHN N CONSTANTINO
24	0	2013	MATTHEW W STATE
24	0	1998	E HOLLANDER
24	0	2007	HERMAN VAN ENGELAND
24	0	2013	EDWIN H COOK
24	0	2007	LOUISE GALLAGHER
23	0	1998	NJ MINSHEW
23	0	2007	HIDEO MATSUZAKI
23	0	2016	HENNING TIEMEIER
23	0	2016	YOSHIO MINABE
23	0	2019	MARK H JOHNSON
23	0	2007	MASATSUGU TSUJII
22	0.04	1999	J PIVEN
22	0.02	2019	MARGOT J TAYLOR
22	0	2019	CHARIS ENG
22	0	2019	TIMOTHY P L ROBERTS
22	0	2019	KATE TCHANTURIA
22	0	2019	THOMAS WERGE
22	0	2019	KEITH M KENDRICK
22	0	2016	AFAF ELANSARY
22	0	2019	BENJAMIN BECKER
21	0.01	1999	MA PERICAKVANCE
21	0	1998	E FOMBONNE
21	0	2016	JEREMY VEENSTRAVANDERWEELE
21	0	2016	LIJIE WU
21	0	2016	DAVID COHEN
21	0	2006	ERIC HOLLANDER
21	0	2016	ROLPH PFUNDT
21	0	2016	YUKO YOSHIMURA
20	0.11	2013	BERNIE DEVLIN
20	0.02	1999	JR GILBERT
20	0.01	1999	ML CUCCARO
20	0.01	2006	EDWIN H
20	0.01	2016	YONGHUI JIANG
20	0	2016	FRANK C VERHULST
20	0	2001	DJ POSEY
20	0	2016	CRAIG A ERICKSON
20	0	2016	HARUHIRO HIGASHIDA
19	0	2013	ANDRE SOURANDER
19	0	2017	ROSA MAROTTA
19	0	2016	XIU XU
18	0.02	1998	C LORD
18	0	2013	ANATH C LIONEL
18	0	1999	HH WRIGHT
18	0	2001	H VAN ENGELAND
17	0.02	2013	MARK J DALY
17	0	2013	ALAN S BROWN
17	0	2013	LAUREN KENWORTHY
17	0	2013	ERIC M MORROW
16	0.11	2010	DALILA PINTO
16	0.1	2013	KATHRYN ROEDER
16	0.1	2010	WENDY ROBERTS
16	0.07	1999	AP MONACO
16	0.02	2001	PF BOLTON
16	0.01	2010	ANTHONY P MONACO
16	0.01	2002	G DAWSON
16	0	2010	ANTONIO M PERSICO
16	0	2006	DAVID A GEIER
16	0	2013	RAPHAEL BERNIER
16	0	2010	PAT LEVITT
16	0	2013	A JEREMY WILLSEY
16	0	2013	HAKON HAKONARSON
16	0	2006	MARK R GEIER
15	0.04	2001	JS SUTCLIFFE
15	0.03	2002	JT MCCRACKEN
15	0.01	2013	BENJAMIN M NEALE
15	0.01	1998	BL LEVENTHAL
15	0	2013	MRC AIMS CONSORTIUM CA
15	0	2013	MICHAEL C O'DONOVAN
15	0	2010	KATSUAKI SUZUKI
15	0	2013	LAILA Y ALAYADHI
15	0	2014	M K C NAIR
15	0	2010	MARGARET A PERICAKVANCE
15	0	2013	RAJESH K KANA
14	0.04	2001	SE FOLSTEIN
14	0.03	2007	SALLY OZONOFF
14	0	1998	M LEBOYER
14	0	1998	JL ADRIEN
14	0	2010	MICHAEL L CUCCARO
14	0	2010	W TED BROWN
13	0.01	1998	GR DELONG
13	0	1998	I RAPIN
13	0	1999	CM WOLPERT
12	0.04	1999	G BAIRD
12	0.04	2007	MARIAN SIGMAN
12	0	2007	CHANTAL KEMNER
12	0	2007	GILLIAN BAIRD
12	0	2007	RANDI J HAGERMAN
12	0	2007	S HOSSEIN FATEMI
12	0	2004	W ROBERTS
11	0.02	2007	GUDRUN NYGREN
11	0	2007	TIMOTHY D FOLSOM
11	0	2007	NOBUMASA KATO
11	0	2007	TOSHIRO SUGIYAMA
11	0	2004	MG AMAN
11	0	1999	SL DONNELLY
11	0	1999	RK ABRAMSON
11	0	2004	L SCAHILL
11	0	1999	SA RAVAN
11	0	2007	ERIC COURCHESNE
11	0	2004	L VON WENDT
11	0	2007	TERI J REUTIMAN
10	0.05	2007	WILLIAM M MCMAHON
10	0.01	2004	E TIERNEY
10	0	2001	F POUSTKA
10	0	2007	JANINE M LASALLE
10	0	2007	JANET E LAINHART
10	0	2007	ANDREW PICKLES
10	0	2007	YASUHIDE IWATA
9	0	2007	JEREMY M SILVERMAN
9	0	2001	SH FATEMI
9	0	2004	T NIEMINENVON WENDT
9	0	2001	C BETANCUR
9	0	2007	YOSHIMOTO SEKINE
9	0	2007	LAWRENCE SCAHILL
9	0	2007	NAHIT MOTAVALLI MUKADDES
9	0	2008	AMI KLIN
9	0	2007	JUDITH K GRETHER
9	0	2007	SUSAN E LEVY
9	0	2007	MASAYOSHI KAWAI
9	0	2004	L MOTTRON
9	0	2007	CAMILLE W BRUNE
9	0	2007	EIJI NANBA
9	0	2007	SHIRO SUDA
8	0.02	2001	F VOLKMAR
8	0	2004	GM ANDERSON
8	0	1998	P SZATMARI
8	0	2004	B VITIELLO
8	0	2004	AL REISS
8	0	2001	S BOLTE
8	0	2004	I JARVELA
7	0.05	1998	A BAILEY
7	0.04	2004	JL MCCAULEY
7	0.03	2004	LE ARNOLD
7	0.02	1999	S WHEELWRIGHT
7	0	2004	B APPELBERG
7	0	2002	A PHILIPPE
7	0	2002	MF CASANOVA
7	0	2004	P TANI
7	0	2001	SM KLAUCK
7	0	2001	MA SPENCE
7	0	2001	KS BEYER
7	0	2004	T PORKKAHEISKANEN
7	0	2004	H TAGERFLUSBERG
7	0	2004	T YLISAUKKOOJA
7	0	2004	N LINDBERG
6	0.07	2001	JA LAMB
6	0.04	2004	JL HAINES
6	0.03	2002	SE FISHER
6	0.03	2004	ER MARTIN
6	0.01	2004	A BATTAGLIA
6	0.01	2005	H COON
6	0.01	2001	A POUSTKA
6	0	2001	E MILLER
6	0	2002	A KLIN
6	0	2002	A SIMMONS
6	0	2005	AJ BAILEY
6	0	2004	E BACCHELLI
6	0	2001	C KEMNER
6	0	2004	O HASHIMOTO
6	0	2004	E MAESTRINI
6	0	1998	J KERBESHIAN
6	0	2004	RM CANTOR
6	0	1998	L BURD
6	0	2001	YJ SHAO
6	0	2001	K PIERCE
6	0	2001	KL REICHELT
6	0	2004	MK BELMONTE
6	0	2004	L PELTONEN
6	0	2004	JD BUXBAUM
6	0	2004	R VANHALA
6	0	2001	MV PLETNIKOV
6	0	2004	M SIGMAN
6	0	2004	DC CHUGANI
6	0	2004	RL FINDLING
6	0	2004	P ASHWOOD
6	0	2001	JP FRYNS
6	0	1998	U FRITH
6	0	2001	KM CARBONE
6	0	1998	J MARTINEAU
6	0	2004	N KATO
6	0	2001	C ANDRES
6	0	2004	MR HERBERT
6	0	2001	M ZAPPELLA
6	0	2006	SALLY WHEELWRIGHT
5	0	1998	DJ COHEN
5	0	1999	JM VANCE
5	0	1999	C CARTWRIGHT
5	0	1999	MM MENOLD
5	0	1999	P HOWLIN
5	0	1999	MP BASS
5	0	1998	J TURK
5	0	1998	M GHAZIUDDIN
5	0	1998	T ISAGER
5	0	1998	R KOBAYASHI
5	0	1998	B RICH
5	0	1998	SE MOURIDSEN
5	0	1998	SE BRYSON
5	0	1998	F HAPPE
4	0.04	1998	M RUTTER
4	0	1998	C FEINSTEIN
4	0	1999	SCR WILLIAMS
4	0	1998	O DEVINSKY
4	0	1998	PM RODIER
4	0	1998	S ROUX
4	0	1998	D GONEN
4	0	1998	D FEIN
4	0	1998	GL HANNA
4	0	1999	ET BULLMORE

## Sheet: instituion
Count	Centrality	Year	Institution
1024	0	2001	Kings Coll London
939	0.03	1998	Univ Toronto
906	0.03	2001	Univ Calif Davis
837	0.19	1998	Univ Calif Los Angeles
820	0.16	1998	Harvard Univ
697	0.83	1998	Univ Washington
689	0.22	1998	Vanderbilt Univ
686	0.1	1998	UCL
661	0.06	2016	Harvard Med Sch
660	0	1998	Johns Hopkins Univ
653	0.06	1998	Univ Penn
649	0	1998	Univ N Carolina
648	0.3	1998	Univ Cambridge
642	0.22	1998	Yale Univ
591	0.03	2010	Karolinska Inst
579	0.05	1998	Univ Calif San Diego
573	0.42	1998	Stanford Univ
571	0.03	2001	Columbia Univ
523	0	2001	Massachusetts Gen Hosp
511	0.18	2001	McGill Univ
488	0.06	2007	Radboud Univ Nijmegen
487	0	1999	Baylor Coll Med
478	0.03	2010	Univ Calif San Francisco
449	0	2002	Childrens Hosp Philadelphia
435	0	2001	Emory Univ
431	0.38	2004	Hosp Sick Children
422	0.06	2007	Univ Melbourne
409	0.83	1998	Univ Oxford
394	0.06	1998	Duke Univ
375	0.27	1998	Boston Univ
354	0.19	1998	Univ Gothenburg
350	0.1	2013	Boston Childrens Hosp
347	0.18	2013	Icahn Sch Med Mt Sinai
336	0.03	2004	Univ Wisconsin
333	0.03	1998	Univ Pittsburgh
325	0	1999	Washington Univ
281	0.49	2001	Univ Illinois
272	0	2004	Univ British Columbia
263	0	1998	NIMH
254	0	1998	Univ Michigan
253	0	1998	NYU
249	0.1	2013	Univ Queensland
245	0.03	1998	Ohio State Univ
231	0.02	2001	Univ Colorado
229	0	2013	Cardiff Univ
191	0	2016	Chinese Acad Sci
177	0.6	1999	Univ Utah
170	0.38	1998	Kennedy Krieger Inst
160	0	2016	Drexel Univ
156	0.27	1998	McMaster Univ
156	0.24	1998	Univ London
152	0.03	1998	Childrens Hosp
136	0.13	2004	Univ Groningen
135	0	2013	Univ Med Ctr Utrecht
134	0	2013	Univ Sydney
133	0	2007	MIT
125	0.16	2001	Univ Montreal
116	0	2007	INSERM
114	0	2001	Univ Minnesota
112	0	2010	Univ So Calif
111	0	2019	Tel Aviv Univ
105	0	2004	Mt Sinai Sch Med
100	0	2019	Univ Southern Calif
94	0.16	2019	Aarhus Univ
93	0	2019	Peking Univ
92	0	2001	Univ Pisa
92	0	2019	Univ Copenhagen
89	1.16	1998	Univ Chicago
89	0	2019	Univ Calgary
83	0	2019	Heidelberg Univ
73	0	2016	Univ Western Australia
71	0.06	1998	Indiana Univ
70	0.13	1998	Univ Paris 05
62	0.32	1998	Inst Psychiat
60	0	2013	Univ Alberta
60	0	2013	Monash Univ
55	0	2013	Univ Massachusetts
48	0.48	1998	Univ Rochester
42	0.03	1998	Univ Helsinki
41	0.29	1999	Univ Texas
39	0.03	2010	CNRS
38	0	2004	Univ Tokyo
37	0	2010	Univ Texas SW Med Ctr Dallas
35	0.22	1998	Univ Calif Irvine
27	0	1999	Albert Einstein Coll Med
26	0	2001	CUNY Mt Sinai Sch Med
26	0	2001	Wayne State Univ
24	0	2007	Ctr Dis Control & Prevent
22	0	2007	Leiden Univ
21	0.03	2004	Univ Med & Dent New Jersey
21	0.03	1999	Univ Iowa
20	0.03	2007	Univ Manchester
19	0	2004	Case Western Reserve Univ
17	0	1998	Inst Child Hlth
16	0	1999	Univ Utrecht
16	0	2004	Rutgers State Univ
14	0.03	1998	Univ S Carolina
14	0	1998	CHU Bretonneau
13	0.06	1998	Univ Oslo
11	0.06	2001	Tufts Univ
9	0	2001	Publ Hlth Lab Serv
9	0	2001	Fac Med
9	0	1998	Univ Birmingham
8	0.03	2001	Univ Roma La Sapienza
8	0.03	1998	Univ Connecticut
8	0	2002	Med Coll Georgia
6	0	1998	St George Hosp
6	0	1998	Univ Maryland
6	0	1998	Univ Florida
5	0.38	1998	Brown Univ
5	0	1998	York Univ
5	0	1998	Tokai Univ
5	0	1998	Bispebjerg Hosp
5	0	1998	Hop Robert Debre
5	0	1998	Guys Hosp

## Sheet: country
Count	Centrality	Year	Country
18663	0.22	1998	USA
4672	0.98	1998	ENGLAND
2687	0.23	2001	CANADA.
2521	0	2006	ITALY.
2479	0	2007	PEOPLES R CHINA.
2095	0.17	2007	GERMANY.
2084	0	2006	AUSTRALIA.
1875	0.04	2007	FRANCE.
1862	0	2006	JAPAN.
1675	0.31	2007	NETHERLANDS.
1108	0.07	2005	SWEDEN.
1090	0	2007	SPAIN.
821	0.02	2007	SWITZERLAND.
713	0.04	2006	ISRAEL.
637	0.02	2007	BELGIUM.
621	0	2008	SOUTH KOREA.
603	0.09	2007	DENMARK.
585	0.02	2007	INDIA.
561	0	2007	BRAZIL.
538	0.46	2007	SCOTLAND.
534	0	2008	TURKEY.
480	0	2008	TAIWAN.
444	0.44	2007	NORWAY.
431	0.04	2008	POLAND.
377	0.02	2008	IRELAND.
361	0.07	2007	WALES.
361	0	2005	IRAN.
355	0.09	2007	SAUDI ARABIA.
337	0.43	2003	FINLAND.
268	0	2007	RUSSIA.
267	0.09	2010	AUSTRIA.
259	0.04	1998	CANADA
228	0.04	1998	ITALY
226	0.26	1998	FRANCE
226	0.21	2010	EGYPT.
217	0.02	2010	SINGAPORE.
210	0.02	2008	PORTUGAL.
173	0	1998	JAPAN
172	0.04	1998	GERMANY
172	0.04	2007	GREECE.
169	0	2010	NEW ZEALAND.
158	0.09	2010	CHILE.
158	0.02	2007	CZECH REPUBLIC.
145	0.7	1998	NETHERLANDS
131	0.02	1998	AUSTRALIA
131	0	2010	HUNGARY.
123	0.02	2010	ARGENTINA.
121	0	2010	SOUTH AFRICA.
118	0.02	1998	SWEDEN
118	0	2007	THAILAND.
114	0.02	2010	MEXICO.
103	0	2013	MALAYSIA.
81	0.09	1998	SPAIN
78	0	2016	U ARAB EMIRATES.
77	0	2013	ROMANIA.
73	0	2010	NORTH IRELAND.
63	0.74	1998	SCOTLAND
60	0	1998	ISRAEL
58	0	2019	PAKISTAN.
54	0	2010	SLOVAKIA.
50	0.02	1998	FINLAND
47	0.02	2016	SERBIA.
46	0.72	1998	DENMARK
45	0	1999	BELGIUM
42	0	2019	QATAR.
41	0.02	2013	CYPRUS.
41	0	1999	SWITZERLAND
41	0	2001	TURKEY
37	0	1998	PEOPLES R CHINA
36	0.7	1998	WALES
35	0.02	1998	NORWAY
32	0.07	1998	BRAZIL
29	0.07	2010	ICELAND.
24	0	2007	CROATIA.
23	0	1998	RUSSIA
20	0.02	1999	SOUTH KOREA
18	0.13	1999	AUSTRIA
17	0.73	1999	IRELAND
17	0.17	1998	POLAND
16	0	2016	GEORGIA.
14	0	2016	ESTONIA.
14	0	2013	COLOMBIA.
14	0	2016	TUNISIA.
13	0	1999	INDIA
13	0	1998	TAIWAN
12	0	2013	SLOVENIA.
10	0	1998	NEW ZEALAND
9	0.72	2001	GREECE
8	0	2012	BULGARIA.
6	0	2002	PORTUGAL
6	0	2002	HUNGARY
6	0	1998	SOUTH AFRICA
6	0	1999	ARGENTINA
5	0	2001	CHILE
4	0	1999	FRANCISCO BAPTISTA/0000-0002-3446-8221
3	0.2	1998	CROATIA
3	0.04	1999	NORTH IRELAND
3	0.02	1999	SAUDI ARABIA
3	0	2006	TUNISIA
3	0	2001	THAILAND
3	0	1998	ICELAND
3	0	2003	COLOMBIA
2	0	1998	SYLVIE/N-5655-2016
2	0	2002	IRAN
2	0	2004	UKRAINE
2	0	1999	LEBANON
2	0	2000	MEXICO
1	0.2	2006	LITHUANIA
1	0.05	2004	GHANA
1	0.05	2004	SRI LANKA
1	0	2003	MARIA JESUS/0000-0003-0572-7383
1	0	2002	KUWAIT
1	0	1998	ANTONIA/0000-0002-5454-8982
1	0	2001	BULGARIA
1	0	1999	EVA/AAA-1433-2020
1	0	2001	SALMA/0000-0002-1724-5405
1	0	1998	CLAIRE/0000-0003-2545-3025
1	0	1999	JOELLE/T-8344-2018
1	0	2002	FREDERIQUE/0000-0003-4763-9066
1	0	1999	ISOBEL/0000-0001-7358-9766
1	0	2000	BRYAN/0000-0002-0561-6520;
1	0	1999	CARME/0000-0002-1838-5557
1	0	2004	LUXEMBOURG
1	0	1999	CATHY/0000-0003-1889-0956
1	0	2001	JUAN MANUEL/0000-0003-2616-8154
1	0	2006	ROMANIA
1	0	2001	SINGAPORE
1	0	2001	TOMASZ/0000-0002-9163-7597
1	0	1998	TOGO
1	0	1998	ANNA/0000-0001-5791-0775
1	0	2005	COSTA RICA.
1	0	2001	TIZIANA/0000-0003-1520-7373
1	0	2005	OMAN
1	0	1998	JAMAICA
1	0	2004	CZECH REPUBLIC
1	0	2002	SOLOMON/0000-0001-9427-9476
1	0	2003	VIETNAM
1	0	2005	SLOVAKIA
1	0	2003	CARLOS E/0000-0001-5148-3063
1	0	1998	HONG KONG
1	0	1998	MARIA/0000-0002-9917-4275
1	0	2001	VENEZUELA
1	0	2004	COSTA RICA
1	0	1998	ERIC/0000-0002-8605-3538
1	0	2004	MACEDONIA
1	0	2001	MARIE-ODILE/0000-0002-4715-9890
1	0	2005	ESTONIA
1	0	2006	UGANDA
1	0	2002	TANZANIA
1	0	2002	MALTA

## Sheet: journal
Journal	Count	citations
autism research	1331	28723
plos one	974	30450
scientific reports	611	7748
molecular autism	596	17051
american journal of medical genetics part a	440	10301
molecular psychiatry	411	27993
frontiers in psychiatry	399	3574
journal of child psychology and psychiatry	365	19314
biological psychiatry	351	31833
pediatrics	349	35382
translational psychiatry	347	10497
behavioural brain research	322	13194
journal of neurodevelopmental disorders	302	7768
journal of neuroscience	297	25469
journal of the american academy of child and adolescent psychiatry	296	26221
proceedings of the national academy of sciences of the united states of	286	32322
developmental medicine and child neurology	273	12130
journal of developmental and behavioral pediatrics	272	9836
journal of child neurology	267	9484
psychiatry research	262	5887
frontiers in neuroscience	260	5266
frontiers in human neuroscience	255	7995
neuroscience and biobehavioral reviews	253	18982
brain sciences	235	1204
american journal of medical genetics part b-neuropsychiatric genetics	234	8030
neuroimage	233	22316
neuropsychologia	229	14650
developmental neurorehabilitation	227	3118
international journal of molecular sciences	226	2904
human molecular genetics	222	14158
european child & adolescent psychiatry	221	4569
brain & development	216	6352
international journal of environmental research and public health	209	1448
journal of child and adolescent psychopharmacology	206	6767
medical hypotheses	201	3811
cerebral cortex	199	8113
brain research	176	9823
neuroscience	175	5007
american journal of human genetics	174	21771
frontiers in cellular neuroscience	169	4123
progress in neuro-psychopharmacology & biological psychiatry	163	4154
revista de neurologia	157	926
frontiers in molecular neuroscience	154	2793
pediatric neurology	150	4436
genes brain and behavior	145	8567
nature communications	143	5008
neuron	143	24309
european journal of human genetics	141	4747
neuroscience letters	141	4657
brain	140	22154
brain behavior and immunity	138	7833
european journal of medical genetics	138	1833
human brain mapping	138	6816
psychological medicine	137	8872
international journal of developmental neuroscience	136	6682
epilepsy & behavior	135	2993
bmc psychiatry	131	3508
journal of speech language and hearing research	131	1770
neuroimage-clinical	125	3071
neuropsychiatric disease and treatment	124	1751
american journal of psychiatry	122	13133
child care health and development	121	2588
social cognitive and affective neuroscience	120	4990
neuropsychopharmacology	118	7855
european journal of neuroscience	116	4068
nature neuroscience	116	15585
journal of medical genetics	112	7702
cell reports	111	3629
neurobiology of disease	111	3344
schizophrenia research	109	4321
neuropharmacology	103	3155
frontiers in behavioral neuroscience	102	1813
journal of intellectual disability research	100	8200
psychoneuroendocrinology	100	4270
psychiatry and clinical neurosciences	98	2035
frontiers in genetics	97	1010
journal of pediatrics	96	4013
clinical genetics	94	2417
genetics in medicine	91	4714
nutrients	91	2016
molecular neurobiology	90	1867
psychiatric genetics	89	1691
epilepsia	88	4330
journal of psychiatric research	88	1948
american journal of speech-language pathology	87	730
child neuropsychology	87	3143
developmental cognitive neuroscience	87	1997
journal of attention disorders	87	1310
nature	87	37913
disability and rehabilitation	86	815
jama psychiatry	86	6178
frontiers in pediatrics	85	1058
american journal of medical genetics	84	5334
annales medico-psychologiques	84	128
mental retardation and developmental disabilities research reviews	83	6226
encephale-revue de psychiatrie clinique biologique et therapeutique	82	466
neurology	82	8778
neuroreport	81	4141
bmj open	80	891
journal of molecular neuroscience	80	838
philosophical transactions of the royal society b-biological sciences	80	7124
brain and cognition	79	3909
cortex	79	4208
human genetics	79	2794
elife	78	1683
plos genetics	77	4624
frontiers in neurology	75	722
journal of neural transmission	75	1830
social neuroscience	73	3083
current opinion in neurobiology	72	6090
european journal of paediatric neurology	71	1568
current psychiatry reports	70	1907
acta paediatrica	69	1770
british journal of psychiatry	69	6375
cell	69	17660
pediatric research	69	4326
augmentative and alternative communication	68	1370
journal of clinical psychiatry	68	2553
physiology & behavior	68	2005
psychopharmacology	68	1898
journal of paediatrics and child health	67	1466
human mutation	66	2039
journal of clinical medicine	66	500
children-basel	64	214
genes	64	559
journal of affective disorders	64	1657
journal of neurochemistry	63	2111
american journal of medical genetics part c-seminars in medical genetics	62	2211
cerebellum	61	3142
psychiatry research-neuroimaging	61	2002
current opinion in psychiatry	60	1357
disability and health journal	60	946
archives of general psychiatry	59	13285
molecular brain	59	983
bmc pediatrics	58	1033
current opinion in neurology	57	3029
neuropsychology	57	3252
archives of disease in childhood	56	2084
developmental psychobiology	56	1412
vaccine	56	2686
clinical neurophysiology	55	3785
developmental neuropsychology	55	2387
ieee access	55	346
journal of biological chemistry	55	1948
metabolic brain disease	55	794
international journal of language & communication disorders	54	1047
molecular cytogenetics	54	516
biological psychology	53	1284
bmc medical genetics	53	1081
brain research bulletin	53	1924
developmental neuroscience	53	1578
experimental brain research	53	1508
journal of neuroinflammation	53	2504
nature genetics	53	21360
schizophrenia bulletin	53	3022
clinical pediatrics	52	704
developmental neurobiology	52	1582
european neuropsychopharmacology	52	1060
biological psychiatry-cognitive neuroscience and neuroimaging	51	813
gene	51	591
hormones and behavior	51	3968
archives de pediatrie	50	189
frontiers in integrative neuroscience	50	376
jama pediatrics	50	2603
journal of pediatric nursing-nursing care of children & families	50	614
neuroscience research	50	1118
brain imaging and behavior	49	763
international journal of social robotics	49	1307
jove-journal of visualized experiments	49	712
molecular and cellular neuroscience	49	1847
pediatric clinics of north america	49	1435
biochemical and biophysical research communications	48	696
journal of communication disorders	48	446
journal of neuroscience research	48	1088
neurotoxicology	48	1825
acta medica mediterranea	47	284
annals of neurology	47	6191
cochrane database of systematic reviews	47	2915
european psychiatry	47	1688
science	47	15232
psychiatry investigation	46	276
quarterly journal of experimental psychology	46	1539
seminars in pediatric neurology	46	647
environmental health perspectives	45	5618
journal of neuroimmunology	45	3010
molecular genetics & genomic medicine	45	194
neurochemistry international	45	847
trends in neurosciences	45	5621
acta psychiatrica scandinavica	44	2042
adapted physical activity quarterly	44	1062
asian journal of psychiatry	44	280
journal of neuroscience methods	44	1037
journal of the international neuropsychological society	44	2325
pediatrics international	44	510
psychiatric services	44	735
arquivos de neuro-psiquiatria	43	446
comprehensive psychiatry	43	1009
early human development	43	1977
indian journal of pediatrics	43	338
international journal of psychophysiology	43	1475
international journal of speech-language pathology	43	614
journal of clinical and experimental neuropsychology	43	1308
journal of human genetics	43	910
medicine	43	304
psychopathology	43	1836
sensors	43	321
trends in cognitive sciences	43	10903
world journal of biological psychiatry	43	1132
eneuro	42	322
nutritional neuroscience	42	1403
psychiatrie de l enfant	42	57
child and adolescent psychiatry and mental health	41	537
clinical linguistics & phonetics	41	203
nervenarzt	41	230
pediatric annals	41	289
anadolu psikiyatri dergisi-anatolian journal of psychiatry	40	92
current pharmaceutical design	40	617
journal of neurophysiology	40	1140
nordic journal of psychiatry	40	494
international journal of pediatric otorhinolaryngology	39	527
psychiatria polska	39	156
brain and behavior	38	419
neural plasticity	38	1114
vision research	38	1420
academic pediatrics	37	919
current opinion in genetics & development	37	1488
environmental research	37	658
international journal of neuropsychopharmacology	37	2328
neurogenetics	37	1307
neurotherapeutics	37	1460
orphanet journal of rare diseases	37	864
physical & occupational therapy in pediatrics	37	511
current opinion in pediatrics	36	1286
journal of cognitive neuroscience	36	4585
neurochemical research	36	764
neurotoxicology and teratology	36	1410
acs chemical neuroscience	35	842
applied neuropsychology-child	35	300
behavior genetics	35	984
clinical neuropsychologist	35	292
european archives of psychiatry and clinical neuroscience	35	702
archives of pediatrics & adolescent medicine	34	4088
biomed research international	34	505
canadian journal of psychiatry-revue canadienne de psychiatrie	34	1669
cns drugs	34	1099
experimental neurology	34	905
journal of comparative neurology	34	849
journal of psychopharmacology	34	1274
neuroscience bulletin	34	720
social science & medicine	34	697
trials	34	156
brain structure & function	33	738
european journal of pediatrics	33	1106
genome medicine	33	1065
neurobiology of learning and memory	33	426
occupational therapy international	33	181
paediatric and perinatal epidemiology	33	799
seminars in speech and language	33	218
sleep medicine	33	885
acta neurobiologiae experimentalis	32	846
behavioral neuroscience	32	1138
cns & neurological disorders-drug targets	32	555
nature reviews neuroscience	32	8703
neurocase	32	894
progress in neurobiology	32	2874
behavioral and brain functions	31	872
neuropediatrics	31	526
bmc medical genomics	30	481
current biology	30	1834
italian journal of pediatrics	30	311
jama-journal of the american medical association	30	6082
journal of alternative and complementary medicine	30	867
molecular genetics and metabolism	30	734
neuroendocrinology letters	30	911
neuroscientist	30	2930
peerj	30	426
australian occupational therapy journal	29	351
cells	29	88
cytogenetic and genome research	29	486
folia phoniatrica et logopaedica	29	119
frontiers in neuroanatomy	29	682
journal of inherited metabolic disease	29	697
journal of medical internet research	29	557
journal of personalized medicine	29	42
plos computational biology	29	974
clinical neuropharmacology	28	442
frontiers in cell and developmental biology	28	95
frontiers in pharmacology	28	647
genome research	28	1403
journal of psychiatry & neuroscience	28	1977
neuropsychobiology	28	1139
perception	28	654
proceedings of the royal society b-biological sciences	28	1370
psychiatria danubina	28	155
science translational medicine	28	2759
jama network open	27	260
medicina-buenos aires	27	43
molecular syndromology	27	60
nucleic acids research	27	1134
psychological bulletin	27	4195
epilepsy research	26	620
frontiers in neural circuits	26	1086
international journal of epidemiology	26	1225
language speech and hearing services in schools	26	104
neuropsychology review	26	3027
psychiatry and clinical psychopharmacology	26	71
american journal of neuroradiology	25	769
australian and new zealand journal of psychiatry	25	599
bmc bioinformatics	25	206
bmc neuroscience	25	661
brain and language	25	1592
cellular and molecular life sciences	25	942
cellular and molecular neurobiology	25	879
cns spectrums	25	605
cognitive neuropsychiatry	25	577
disease models & mechanisms	25	1361
expert review of neurotherapeutics	25	671
international journal of eating disorders	25	953
journal of pediatric health care	25	272
journal of vision	25	461
life sciences	25	873
noropsikiyatri arsivi-archives of neuropsychiatry	25	108
pharmacological research	25	515
pharmacology biochemistry and behavior	25	644
science advances	25	294
stem cell research	25	70
british journal of occupational therapy	24	157
cognitive affective & behavioral neuroscience	24	436
journal of neuroendocrinology	24	1084
lancet	24	15976
annals of epidemiology	23	911
archives of psychiatric nursing	23	276
bjpsych open	23	133
clinical child psychology and psychiatry	23	310
epidemiology	23	1617
frontiers in endocrinology	23	304
genomics	23	964
ieee transactions on neural systems and rehabilitation engineering	23	500
journal of experimental psychology-human perception and performance	23	962
acta neuropsychiatrica	22	264
american journal of epidemiology	22	1287
bioinformatics	22	203
bmc genomics	22	408
clinical psychopharmacology and neuroscience	22	432
current medicinal chemistry	22	622
dialogues in clinical neuroscience	22	616
journal of clinical neuroscience	22	192
journal of nervous and mental disease	22	403
lancet psychiatry	22	2060
applied sciences-basel	21	70
behavioural neurology	21	334
bmc medicine	21	1727
brain connectivity	21	151
cognitive neuropsychology	21	821
epigenetics	21	805
european journal of pharmacology	21	1062
frontiers in physiology	21	477
klinik psikofarmakoloji bulteni-bulletin of clinical psychopharmacology	21	90
medical image analysis	21	230
pediatric dentistry	21	496
bulletin de l academie nationale de medecine	20	47
child and adolescent mental health	20	365
communications biology	20	110
environment international	20	739
epigenomics	20	717
fortschritte der neurologie psychiatrie	20	143
genome biology	20	903
journal for specialists in pediatric nursing	20	356
journal of clinical psychopharmacology	20	715
journal of physiology-london	20	1123
journal of trace elements in medicine and biology	20	272
medical science monitor	20	436
nature medicine	20	3888
scandinavian journal of occupational therapy	20	116
social psychiatry and psychiatric epidemiology	20	498
zhurnal nevrologii i psikhiatrii imeni s s korsakova	20	56
appetite	19	256
childs nervous system	19	222
computers & education	19	733
current neuropharmacology	19	492
development	19	976
experimental neurobiology	19	536
expert opinion on pharmacotherapy	19	351
faseb journal	19	966
frontiers in immunology	19	379
journal of clinical investigation	19	1810
neurotoxicity research	19	651
pediatric emergency care	19	179
prostaglandins leukotrienes and essential fatty acids	19	1284
quality of life research	19	370
reproductive toxicology	19	663
reviews in the neurosciences	19	322
translational neuroscience	19	288
twin research and human genetics	19	1165
universal access in the information society	19	77
alternative therapies in health and medicine	18	301
biochimica et biophysica acta-molecular basis of disease	18	593
biological trace element research	18	781
bmj-british medical journal	18	979
brain topography	18	407
clinica chimica acta	18	518
cns neuroscience & therapeutics	18	661
cognitive and behavioral neurology	18	583
epidemiology and psychiatric sciences	18	355
frontiers in neuroinformatics	18	476
frontiers in synaptic neuroscience	18	182
glia	18	481
heliyon	18	29
journal of neuropsychiatry and clinical neurosciences	18	740
journal of pediatric gastroenterology and nutrition	18	556
journal of toxicology and environmental health-part a-current issues	18	582
m s-medecine sciences	18	92
medicina-lithuania	18	112
molecules	18	95
neurocomputing	18	305
neuropsychiatry	18	308
neurosciences	18	131
plos biology	18	1154
sleep	18	937
american journal of obstetrics and gynecology	17	567
american journal of public health	17	1012
current neurology and neuroscience reports	17	850
environmental health	17	450
frontiers in public health	17	178
harvard review of psychiatry	17	678
international journal of clinical and experimental medicine	17	87
jornal de pediatria	17	268
molecular medicine reports	17	97
neurological sciences	17	209
neuromolecular medicine	17	409
new england journal of medicine	17	5825
pediatric physical therapy	17	302
rivista di psichiatria	17	136
zhurnal vysshei nervnoi deyatelnosti imeni i p pavlova	17	19
bmc neurology	16	488
canadian journal of occupational therapy-revue canadienne d ergotherapie	16	159
clinical eeg and neuroscience	16	149
epileptic disorders	16	138
genetic counseling	16	234
indian pediatrics	16	199
issues in mental health nursing	16	218
journal of clinical sleep medicine	16	332
journal of ect	16	280
journal of genetic counseling	16	372
monatsschrift kinderheilkunde	16	18
multimedia tools and applications	16	50
nature reviews genetics	16	5461
neural regeneration research	16	135
paediatrics & child health	16	72
seizure-european journal of epilepsy	16	246
turkish journal of pediatrics	16	38
world journal of pediatrics	16	215
acta neuropathologica	15	1671
acta neuropathologica communications	15	322
annals of general psychiatry	15	253
autism: neural basis and treatment possibilities	15	422
behavioural pharmacology	15	240
cognitive neurodynamics	15	126
current genomics	15	532
developmental disabilities research reviews	15	601
febs letters	15	365
frontiers in neuroendocrinology	15	1497
human reproduction	15	488
indian journal of psychiatry	15	76
international journal of human-computer studies	15	346
iscience	15	42
jmir mental health	15	80
lancet neurology	15	3334
npj genomic medicine	15	303
oxidative medicine and cellular longevity	15	421
personal and ubiquitous computing	15	508
psychophysiology	15	2505
revista brasileira de psiquiatria	15	281
science of the total environment	15	284
anales de pediatria	14	67
anthrozoos	14	587
archivos argentinos de pediatria	14	26
biomedical signal processing and control	14	61
biomolecules	14	62
bmc public health	14	389
brain injury	14	324
british journal of pharmacology	14	527
current problems in pediatric and adolescent health care	14	338
environmental science and pollution research	14	94
evidence-based complementary and alternative medicine	14	277
ieee transactions on affective computing	14	305
iranian journal of pediatrics	14	48
journal of alzheimers disease	14	282
journal of neurolinguistics	14	300
journal of neuropathology and experimental neurology	14	976
nature reviews neurology	14	1880
neurologic clinics	14	346
royal society open science	14	283
science signaling	14	432
scientific world journal	14	264
toxicology	14	334
trends in molecular medicine	14	1725
autism	13	29
biochemical pharmacology	13	414
bmc health services research	13	148
brain pathology	13	1015
catatonia in autism spectrum disorders	13	293
clinical dysmorphology	13	118
clinical neuroscience research	13	394
clinical therapeutics	13	602
disease markers	13	228
frontiers in bioscience-landmark	13	322
frontiers in computational neuroscience	13	97
gaba in autism and related disorders	13	415
health and quality of life outcomes	13	550
international journal of human-computer interaction	13	78
international journal of neuroscience	13	151
journal of clinical endocrinology & metabolism	13	1065
journal of genetic psychology	13	128
journal of neurology neurosurgery and psychiatry	13	754
journal of the neurological sciences	13	603
lipids in health and disease	13	249
molecular biology reports	13	51
neurologia	13	106
nutrition	13	445
pediatric anesthesia	13	188
pharmacology & therapeutics	13	841
prenatal diagnosis	13	329
science china-life sciences	13	140
trends in genetics	13	1146
annals of clinical and translational neurology	12	151
annals of clinical psychiatry	12	420
australasian psychiatry	12	86
biology open	12	85
biomarkers in medicine	12	405
cold spring harbor perspectives in medicine	12	197
computers in biology and medicine	12	447
entropy	12	220
free radical biology and medicine	12	594
g3-genes genomes genetics	12	252
healthcare	12	46
human movement science	12	248
ieee transactions on medical imaging	12	512
jcpsp-journal of the college of physicians and surgeons pakistan	12	102
journal of clinical pediatric dentistry	12	86
journal of maternal-fetal & neonatal medicine	12	118
journal of medical systems	12	369
journal of neurology	12	305
journal of neuropsychology	12	285
journal of pediatric endocrinology & metabolism	12	63
journal of psychosocial nursing and mental health services	12	27
journal of the pakistan medical association	12	30
minerva pediatrica	12	153
movement disorders	12	357
neural networks	12	580
pediatric drugs	12	220
physiological research	12	96
stem cells translational medicine	12	230
sustainability	12	20
synapse	12	491
synthese	12	58
yonsei medical journal	12	78
american journal of perinatology	11	108
animals	11	50
annali dell istituto superiore di sanita	11	95
archives of clinical neuropsychology	11	455
asia-pacific psychiatry	11	45
attention perception & psychophysics	11	96
biomedicine & pharmacotherapy	11	110
bmc complementary and alternative medicine	11	109
clinical epigenetics	11	215
current molecular medicine	11	364
ebiomedicine	11	280
embo reports	11	78
endocrinology	11	611
expert review of molecular diagnostics	11	265
families systems & health	11	184
gait & posture	11	224
genetic epidemiology	11	152
genetics	11	152
human heredity	11	185
international journal of biochemistry & cell biology	11	428
international journal on disability and human development	11	132
journal of korean medical science	11	140
journal of medicinal chemistry	11	132
journal of pharmacology and experimental therapeutics	11	425
learning & memory	11	247
multisensory research	11	75
neuroimmunomodulation	11	119
neuropsychological rehabilitation	11	185
perspectives in psychiatric care	11	80
pharmacopsychiatry	11	209
presse medicale	11	42
seminars in cell & developmental biology	11	232
seminars in fetal & neonatal medicine	11	529
sleep medicine reviews	11	893
telemedicine and e-health	11	222
acta neurologica belgica	10	51
alcoholism-clinical and experimental research	10	454
american family physician	10	288
annals of human genetics	10	368
annals of pharmacotherapy	10	191
annals of the new york academy of sciences	10	390
biochemical society transactions	10	373
biochimie	10	129
bioessays	10	306
brain stimulation	10	355
child psychiatry & human development	10	642
clinical biochemistry	10	465
clinical endocrinology	10	378
clinical psychological science	10	77
complementary therapies in medicine	10	78
congenital anomalies	10	130
depression and anxiety	10	517
eating and weight disorders-studies on anorexia bulimia and obesity	10	95
environmental pollution	10	186
fertility and sterility	10	418
frontiers in veterinary science	10	80
genes & development	10	454
genetic testing and molecular biomarkers	10	138
human genomics	10	134
international clinical psychopharmacology	10	157
international journal of methods in psychiatric research	10	245
international journal of psychiatry in clinical practice	10	69
journal of biomedical informatics	10	111
journal of biomedical science	10	303
journal of child health care	10	58
journal of clinical nursing	10	93
journal of epidemiology and community health	10	510
journal of medical ethics	10	100
journal of proteome research	10	728
journal of psychosomatic research	10	475
journal of sleep research	10	674
nervenheilkunde	10	6
neurobiology of autism	10	342
neuroinformatics	10	198
neurology-genetics	10	106
neuropathology and applied neurobiology	10	598
neurophysiology	10	45
pakistan journal of medical sciences	10	33
peptides	10	197
southern medical journal	10	75
stem cell reports	10	231
stress and health	10	130
translational anatomy and cell biology of autism spectrum disorder	10	56
american journal of clinical nutrition	9	1308
anales de psicologia	9	131
balkan journal of medical genetics	9	28
basic & clinical pharmacology & toxicology	9	192
biochemistry	9	253
biometals	9	153
bmj paediatrics open	9	34
british journal of general practice	9	392
british medical journal	9	985
ceska a slovenska neurologie a neurochirurgie	9	8
critical reviews in food science and nutrition	9	187
diagnostics	9	69
drug safety	9	324
ear and hearing	9	771
early intervention in psychiatry	9	237
embo journal	9	381
environmental toxicology and pharmacology	9	1031
european journal of paediatric dentistry	9	78
european review for medical and pharmacological sciences	9	191
experimental and therapeutic medicine	9	50
expert opinion on drug safety	9	194
expert systems with applications	9	193
frontiers in aging neuroscience	9	102
frontiers in nutrition	9	71
general hospital psychiatry	9	200
ieee transactions on biomedical engineering	9	109
ieee transactions on cognitive and developmental systems	9	65
in vivo	9	165
international journal of paediatric dentistry	9	179
international journal of psychiatry in medicine	9	78
investigative ophthalmology & visual science	9	79
jnp-journal for nurse practitioners	9	62
journal of anatomy	9	184
journal of cellular and molecular medicine	9	754
journal of chemical neuroanatomy	9	215
journal of genetics and genomics	9	99
journal of neurogenetics	9	299
journal of nutritional biochemistry	9	244
journal of pharmacological sciences	9	332
journal of physiology-paris	9	133
journal of psychiatric practice	9	64
journal of the american academy of audiology	9	32
journal of the formosan medical association	9	97
journal of translational medicine	9	203
medical journal of australia	9	206
microbiome	9	1218
neural development	9	210
neurochemical journal	9	19
neuropeptides	9	436
pediatric dermatology	9	32
pflugers archiv-european journal of physiology	9	230
pharmacotherapy	9	233
revue neurologique	9	114
saudi medical journal	9	67
stem cells	9	292
symmetry-basel	9	62
systematic reviews	9	25
toxicological sciences	9	250
toxicology and applied pharmacology	9	210
translational pediatrics	9	57
trends in pharmacological sciences	9	1862
world psychiatry	9	420
aging-us	8	77
anaerobe	8	909
anatomical record-advances in integrative anatomy and evolutionary	8	354
annals of indian academy of neurology	8	39
antioxidants	8	48
archives of toxicology	8	544
behavioral and brain sciences	8	5453
behavioral sleep medicine	8	159
behaviour & information technology	8	54
behavioural processes	8	37
biomedicines	8	30
birth defects research	8	89
bratislava medical journal-bratislavske lekarske listy	8	58
canadian journal of neurological sciences	8	165
clinical chemistry	8	449
clinical epidemiology	8	52
cognitive brain research	8	1575
cold spring harbor perspectives in biology	8	939
developmental dynamics	8	195
electronics	8	24
experimental biology and medicine	8	395
frontiers in cellular and infection microbiology	8	249
frontiers in microbiology	8	1188
functional neurology	8	205
genetics and molecular research	8	46
health informatics journal	8	93
health technology assessment	8	148
ieee journal of biomedical and health informatics	8	62
jama neurology	8	257
journal of cell science	8	356
journal of eating disorders	8	28
journal of molecular diagnostics	8	444
journal of neuroimaging	8	202
journal of nutrition	8	148
journal of obsessive-compulsive and related disorders	8	83
journal of the academy of nutrition and dietetics	8	239
journal of the american dental association	8	236
logopedics phoniatrics vocology	8	53
mediators of inflammation	8	255
medicina oral patologia oral y cirugia bucal	8	118
medizinische genetik	8	36
mitochondrion	8	192
neurological research	8	171
neuromuscular disorders	8	44
neurorehabilitation	8	26
pharmacoepidemiology and drug safety	8	49
pharmacological reports	8	323
placenta	8	86
progress in biochemistry and biophysics	8	8
scientific american	8	446
structure	8	322
world journal of psychiatry	8	33
advances in vasopressin and oxytocin: from genes to behaviour to disease	7	679
aging & mental health	7	205
amino acids	7	167
applied neuropsychology-adult	7	16
applied soft computing	7	98
archives of disease in childhood-education and practice edition	7	163
archives of iranian medicine	7	52
artificial intelligence in medicine	7	49
biology of sex differences	7	232
biomarkers	7	302
biomolecules & therapeutics	7	46
bioscience reports	7	36
bipolar disorders	7	296
bmc biology	7	60
cell death & disease	7	119
cell stem cell	7	753
chemico-biological interactions	7	71
chemosphere	7	154
childhood obesity	7	138
complementary therapies in clinical practice	7	92
computational and mathematical methods in medicine	7	106
current drug targets	7	282
current topics in medicinal chemistry	7	77
current treatment options in neurology	7	135
cytokine	7	172
developmental biology	7	102
drugs	7	346
endocrine metabolic & immune disorders-drug targets	7	60
expert opinion on drug discovery	7	154
expert opinion on investigational drugs	7	105
frontiers in systems neuroscience	7	35
health affairs	7	212
hearing research	7	230
hippocampus	7	201
hong kong journal of occupational therapy	7	45
hong kong journal of paediatrics	7	18
human reproduction update	7	379
ideggyogyaszati szemle-clinical neuroscience	7	23
ieee pervasive computing	7	190
indian journal of medical research	7	99
international journal of audiology	7	90
international journal of molecular medicine	7	67
investigacion clinica	7	46
israel medical association journal	7	90
jci insight	7	40
journal of ambient intelligence and humanized computing	7	23
journal of comparative psychology	7	165
journal of family nursing	7	53
journal of international medical research	7	74
journal of molecular biology	7	177
journal of perinatology	7	157
journal of pineal research	7	539
journal of research in medical sciences	7	314
journal of school nursing	7	106
journal of steroid biochemistry and molecular biology	7	317
lgbt health	7	225
mammalian genome	7	325
medical principles and practice	7	51
metabolites	7	34
microorganisms	7	606
molecular pharmacology	7	194
nature protocols	7	903
network neuroscience	7	48
neural computing & applications	7	77
neurophysiologie clinique-clinical neurophysiology	7	190
obesity	7	214
pediatrics and neonatology	7	91
pharmacoeconomics	7	156
physical therapy	7	80
physiological reviews	7	2303
plos medicine	7	308
psychological review	7	554
psychosomatic medicine	7	340
russian journal of genetics	7	26
srpski arhiv za celokupno lekarstvo	7	26
turkish journal of medical sciences	7	55
alternative medicine review	6	482
american journal of orthopsychiatry	6	347
american journal of reproductive immunology	6	195
annals of allergy asthma & immunology	6	163
annals of medicine	6	373
annals of nutrition and metabolism	6	92
archives of neurology	6	1051
autoimmunity reviews	6	248
biochemical journal	6	776
biomedical optics express	6	98
bioorganic & medicinal chemistry letters	6	48
birth defects research part c-embryo today-reviews	6	279
bjog-an international journal of obstetrics and gynaecology	6	254
bmc genetics	6	202
bmc oral health	6	34
bmc systems biology	6	130
brazilian journal of psychiatry	6	23
british journal of hospital medicine	6	17
british medical bulletin	6	339
canadian family physician	6	27
cell and tissue research	6	227
cellular signalling	6	76
chemical research in toxicology	6	86
cognitive neuroscience	6	146
computer methods and programs in biomedicine	6	119
croatian medical journal	6	100
environmental science & technology	6	85
european journal of epidemiology	6	86
european journal of neurology	6	188
european journal of public health	6	121
evolution and human behavior	6	72
experimental and clinical psychopharmacology	6	121
experimental and molecular medicine	6	124
expert opinion on therapeutic patents	6	145
expert systems	6	52
genetic models and molecular pathways underlying autism spectrum	6	45
gut microbes	6	116
human immunology	6	295
international journal of human genetics	6	7
international journal of immunopathology and pharmacology	6	167
international journal of mental health and addiction	6	50
international journal of morphology	6	23
international journal of neural systems	6	120
journal of adolescent health	6	161
journal of cell biology	6	157
journal of chromatography b-analytical technologies in the biomedical	6	101
journal of clinical neurophysiology	6	246
journal of developmental origins of health and disease	6	115
journal of experimental medicine	6	131
journal of experimental psychology-learning memory and cognition	6	142
journal of immunotoxicology	6	122
journal of integrative neuroscience	6	37
journal of perinatal medicine	6	126
journal of the american medical informatics association	6	155
journal of the american psychiatric nurses association	6	47
life-basel	6	3
mmwr surveillance summaries	6	4336
neuroradiology	6	272
neurosignals	6	230
nursing & health sciences	6	19
optometry and vision science	6	58
pediatric infectious disease journal	6	156
pediatric radiology	6	201
postepy higieny i medycyny doswiadczalnej	6	13
protein & cell	6	71
psychosomatics	6	26
radiology	6	132
research quarterly for exercise and sport	6	71
signal processing-image communication	6	5
social studies of science	6	151
stem cell reviews and reports	6	60
stem cells and development	6	161
world neurosurgery	6	16
yakugaku zasshi-journal of the pharmaceutical society of japan	6	7
acta neurologica scandinavica	5	167
adaptive behavior	5	41
american journal of chinese medicine	5	78
analytical and bioanalytical chemistry	5	172
annual review of neuroscience	5	993
applied clinical informatics	5	40
archives of gynecology and obstetrics	5	22
archives of medical research	5	114
asn neuro	5	207
australian family physician	5	42
australian journal of general practice	5	11
biochimica et biophysica acta-general subjects	5	90
biological research for nursing	5	19
biological reviews	5	208
biology letters	5	182
chemical senses	5	36
clinical anatomy	5	73
clinical and experimental optometry	5	52
clinical psychologist	5	73
cognitive computation	5	131
current molecular pharmacology	5	54
current opinion in clinical nutrition and metabolic care	5	309
current opinion in pharmacology	5	314
developmental cell	5	401
drug discovery today	5	196
ecotoxicology and environmental safety	5	26
embo molecular medicine	5	130
epigenetics & chromatin	5	138
epilepsy currents	5	97
european journal of endocrinology	5	148
evidence-based mental health	5	49
experimental animals	5	134
expert opinion on therapeutic targets	5	89
febs journal	5	10
food and chemical toxicology	5	89
gene expression patterns	5	101
gut pathogens	5	57
ieee transactions on autonomous mental development	5	136
ieee transactions on learning technologies	5	48
international immunopharmacology	5	28
international journal of genomics	5	113
international journal of humanoid robotics	5	44
international journal of hygiene and environmental health	5	241
international journal of medical informatics	5	190
jmir mhealth and uhealth	5	75
journal of applied genetics	5	233
journal of cellular biochemistry	5	61
journal of cellular physiology	5	119
journal of clinical immunology	5	356
journal of evaluation in clinical practice	5	288
journal of general internal medicine	5	257
journal of neurosurgery-pediatrics	5	51
journal of reproductive immunology	5	79
journal of toxicological sciences	5	59
journal of tropical pediatrics	5	115
lancet child & adolescent health	5	87
methods	5	98
molecular and cellular probes	5	62
molecular biology of the cell	5	100
molecular cell	5	278
molecular medicine	5	123
molecules and cells	5	80
msphere	5	47
msystems	5	77
nature reviews disease primers	5	700
neurodegenerative diseases	5	57
neurogastroenterology and motility	5	185
neuroimaging clinics of north america	5	79
neurology india	5	41
neurophotonics	5	48
nigerian journal of clinical practice	5	49
npj digital medicine	5	92
nutrition research	5	92
nutrition reviews	5	120
oncogene	5	634
open biology	5	92
patient education and counseling	5	28
pattern recognition letters	5	52
pharmacogenomics journal	5	121
philosophical transactions of the royal society of london series	5	973
postgraduate medical journal	5	57
primary care	5	18
proteomics clinical applications	5	85
regulatory peptides	5	196
revista de psiquiatria y salud mental	5	32
romanian biotechnological letters	5	5
seminars in neurology	5	88
stem cell research & therapy	5	38
stem cells international	5	90
therapie	5	14
toxicological and environmental chemistry	5	56
toxicology and industrial health	5	59
toxicology letters	5	253
toxics	5	13
western journal of nursing research	5	44
world journal of gastroenterology	5	398

## Sheet: the top1000 keywords
keyword	occurrences
autism	14300
children	9936
autism spectrum disorder	6760
autism spectrum disorders	4185
brain	3322
schizophrenia	3021
spectrum disorders	2942
prevalence	2425
adolescents	2210
individuals	2165
behavior	1976
expression	1888
young-children	1746
association	1739
adults	1708
asperger-syndrome	1689
risk	1647
spectrum disorder	1616
mouse model	1603
intellectual disability	1601
disorders	1492
mutations	1407
gene	1377
high-functioning autism	1377
epilepsy	1315
pervasive developmental disorders	1279
diagnosis	1260
mental-retardation	1147
anxiety	1133
perception	1086
adhd	1083
attention	1066
social cognition	1058
disorder	1039
abnormalities	1031
attention-deficit/hyperactivity disorder	1029
asd	1027
language	997
depression	989
spectrum	978
activation	958
identification	952
deficits	950
de-novo mutations	934
symptoms	922
recognition	881
mice	871
deficit hyperactivity disorder	861
prefrontal cortex	849
age	843
genetics	840
population	834
neurodevelopmental disorders	823
oxidative stress	817
mind	805
fmri	802
fragile-x-syndrome	796
stress	782
cortex	778
phenotype	752
intervention	747
childhood	740
synaptic plasticity	733
pregnancy	732
disease	730
functional connectivity	725
bipolar disorder	724
communication	719
double-blind	715
protein	714
oxytocin	697
connectivity	693
model	674
metaanalysis	664
genes	663
patterns	662
epidemiology	656
gene-expression	654
parents	650
autistic disorder	649
psychiatric-disorders	646
mechanisms	642
infants	637
dysfunction	636
amygdala	635
cognition	634
memory	631
health	625
neurons	617
neurodevelopment	593
alzheimers-disease	592
mri	589
variants	589
infantile-autism	570
rett-syndrome	565
diagnostic interview	562
performance	553
fragile x syndrome	545
development	544
theory of mind	542
comorbidity	535
impairment	521
executive function	520
risk-factors	519
exposure	512
empathy	511
inflammation	507
classification	499
sex-differences	499
hippocampus	497
toddlers	496
developmental delay	492
serotonin	491
genome-wide association	490
joint attention	488
speech	487
responses	485
validity	484
follow-up	481
system	477
cerebellum	473
brain-development	471
obsessive-compulsive disorder	468
outcomes	467
reliability	465
eeg	459
family	450
emotion	448
prenatal exposure	446
united-states	436
working-memory	436
deletion	428
white-matter	428
mothers	426
inhibition	425
copy number variation	419
behaviors	416
skills	415
childhood autism	411
impact	406
people	400
corpus-callosum	398
mental-retardation protein	397
dna methylation	392
traits	391
long-term potentiation	386
receptor	385
autism spectrum disorder (asd)	379
facial expressions	379
plasticity	378
scale	377
preschool-children	375
asperger syndrome	374
human brain	373
quality-of-life	370
linkage	368
valproic acid	365
disabilities	362
mouse	359
functioning autism	355
validation	352
messenger-rna	346
social behavior	345
young-adults	345
developmental disorders	343
imitation	342
network	342
emotion recognition	335
pervasive developmental disorder	335
repetitive behaviors	334
sleep	332
therapy	332
seizures	328
animal-model	327
vasopressin	327
child	324
individual-differences	324
central-nervous-system	322
biomarkers	319
repetitive behavior	317
early intervention	316
copy-number variation	311
risperidone	311
cells	309
mental retardation	309
growth	306
gut microbiota	304
psychopathology	303
phenotypes	302
social-behavior	302
in-vivo	300
mouse models	300
diagnostic observation schedule	299
cerebral-cortex	296
developmental-disabilities	295
parkinsons-disease	295
dopamine	294
mutation	294
care	293
gaba	291
psychosis	290
management	289
event-related potentials	284
interventions	282
epigenetics	281
families	281
obesity	281
mental-health	280
tuberous sclerosis complex	279
mecp2	278
features	277
susceptibility	277
metabolism	275
differentiation	273
organization	272
youth	272
disability	270
meta-analysis	269
information	266
rat	266
basal ganglia	264
head circumference	263
autistic traits	262
networks	262
randomized controlled-trial	261
down-syndrome	260
rett syndrome	260
polymorphism	257
synapse	255
adolescence	254
face	253
maternal immune activation	253
questionnaire	252
complex	250
language impairment	247
severity	246
modulation	245
duplication	244
neuroinflammation	244
treatment	243
motor	242
executive functions	241
frontal-cortex	241
medial prefrontal cortex	237
mental health	236
deficit/hyperactivity disorder	235
efficacy	235
cerebral-palsy	234
glutamate	234
microglia	234
binding	232
cancer	231
neurotrophic factor	231
shank3	229
infection	228
neuroimaging	228
psychometric properties	227
sex differences	227
hyperactivity	224
experiences	223
spectrum quotient aq	223
gastrointestinal symptoms	222
microdeletion	222
region	222
humans	220
students	220
predictors	219
social interaction	218
sensitivity	217
cytokines	214
neurodevelopmental disorder	214
nervous-system	213
prader-willi-syndrome	213
regression	213
birth	212
attention deficit hyperactivity disorder	211
autism spectrum	211
dendritic spines	211
intelligence	211
males	211
proteins	211
heritability	210
intranasal oxytocin	210
mitochondrial dysfunction	210
receptors	210
gaze	209
placebo-controlled trial	209
evolution	208
neurogenesis	207
biomarker	206
integration	206
autistic spectrum disorder	205
machine learning	205
rats	205
faces	204
aggression	203
reveals	201
gender	200
life	200
magnetic resonance imaging	199
major depressive disorder	199
siblings	199
cerebrospinal-fluid	198
rating-scale	198
genome	197
twin	197
deficiency	196
discrimination	196
voxel-based morphometry	194
biological motion	191
superior temporal sulcus	191
women	190
behavior problems	189
microbiota	189
brain development	188
adolescent	187
neuropsychiatric disorders	187
polymorphisms	187
synaptic-transmission	186
boys	184
cortical thickness	184
heterogeneity	184
general-population	183
tuberous sclerosis	183
mercury	182
ultrasonic vocalizations	182
deletions	180
maturation	180
phosphorylation	180
psychiatric disorders	180
pathways	179
screening	179
social-interaction	179
systematic review	178
de-novo	177
intellectual disabilities	176
self	176
transcription	175
neurobiology	174
patient	174
animal-models	173
anterior cingulate cortex	173
models	173
psychiatry	172
alzheimer's disease	171
assessment	171
melatonin	171
rat-brain	171
fmrp	170
long-term depression	170
profiles	170
environment	169
major depression	169
education	167
mirror neuron system	167
serotonin transporter	167
impairments	166
prediction	166
anxiety disorders	165
measles	165
pain	165
rearrangements	165
down syndrome	164
deficit-hyperactivity disorder	163
gender-differences	163
knockout mice	163
trial	163
mice lacking	162
etiology	161
interview	161
social communication	161
hyperactivity disorder	160
safety	160
structural variation	160
comprehension	158
linked mental-retardation	158
mtor	158
sentence comprehension	158
architecture	157
copy number variants	157
diffusion tensor imaging	157
localization	157
dorsolateral prefrontal cortex	156
fragile-x	156
infancy	155
infantile spasms	155
services	155
angelman-syndrome	154
neural basis	154
default mode network	153
fmr1	152
high-risk	152
multiple-sclerosis	152
program	152
animal model	151
gene expression	151
angelman syndrome	150
coherence	150
eye-tracking	150
loci	150
task	150
prepulse inhibition	149
methylation	148
blood	147
brain connectivity	147
cognitive control	147
parenting stress	146
translation	146
version	146
antibodies	145
attention-deficit	144
autoantibodies	144
dynamics	144
methylphenidate	144
developmental disabilities	143
reward	143
decision-making	142
low-birth-weight	142
neuroanatomy	142
quality of life	142
volume	142
cognitive impairment	141
experience	141
modified checklist	141
pluripotent stem-cells	141
autistic spectrum disorders	140
infant	140
movement	140
personality	140
eye tracking	139
fusiform face area	139
stability	139
family-history	138
size	138
deficit	137
framework	137
sex	137
candidate genes	136
mitochondria	136
play	136
sleep problems	136
abilities	135
face recognition	135
serum	135
variability	135
williams-syndrome	135
acquisition	134
attitudes	134
autism spectrum disorders (asd)	134
functional mri	134
quality	134
alexithymia	133
cohort	133
knowledge	133
oscillations	133
pathway	133
school	133
bdnf	132
common	132
cpg-binding protein-2	132
emotions	132
in-vitro	132
preschoolers	132
review	132
autoimmunity	131
face perception	131
posttraumatic-stress-disorder	131
cortisol	130
fear	130
intestinal microbiota	130
microbiome	130
nmda receptor	130
quotient	130
serotonin reuptake inhibitors	129
transmission	129
neuronal migration	128
placebo	128
testosterone	128
animal models	127
disruption	127
onset	127
visual-cortex	127
associations	126
chain fatty-acids	126
mammalian target	126
mumps	126
support	126
autoimmune-diseases	125
electroencephalography	125
emotion regulation	125
human cerebral-cortex	125
trends	125
aspergers-syndrome	124
fetal testosterone	124
immunization	124
molecular characterization	124
open-label	124
plasma	124
white matter	124
ability	123
girls	123
pediatrics	123
risk factors	123
asperger's syndrome	122
young-people	122
acid	121
dysregulation	121
neuropsychology	121
perceptions	121
representation	121
sociability	121
adaptation	120
selective attention	120
synapses	120
transcranial magnetic stimulation	120
eye gaze	119
face processing	119
functional magnetic resonance imaging	119
mutant mice	119
social brain	119
checklist	118
cortical development	118
endophenotype	118
expressions	118
hippocampal-neurons	118
history	118
insights	118
mirror neurons	118
social attention	118
apoptosis	117
body-mass index	117
neuroscience	117
stimuli	117
microglial activation	116
participation	116
visual-attention	116
anorexia-nervosa	115
cnv	115
parent	115
paternal age	115
social skills	115
access	114
disabilities monitoring network	114
dyslexia	114
gaba(a) receptor	114
postsynaptic density	114
sample	114
vaccines	114
blood-brain-barrier	113
frequency	113
in-utero exposure	113
mechanism	113
aberrant behavior checklist	112
anxiety-like behavior	112
gut-brain axis	112
irritable-bowel-syndrome	112
neurodegeneration	112
temporal-lobe epilepsy	112
cerebral palsy	111
challenges	111
criteria	111
database	111
immune activation	111
magnetoencephalography	111
motion	111
transcriptome	111
array cgh	110
central coherence	110
genomic screen	110
interneurons	110
microarray	110
supplementation	110
astrocytes	109
children born	109
cognitive-behavioral therapy	109
early identification	109
neural circuitry	109
physical-activity	109
tourette syndrome	109
brain-stem	108
chromatin	108
females	108
learning	108
migration	108
neuroligin	108
self-injurious-behavior	108
chromosomal microarray	107
dementia	107
erp	107
irritability	107
adult	106
controlled-trial	106
drosophila	106
health-care	106
perspectives	106
preterm birth	106
sensory processing	106
striatum	106
thimerosal	106
time	106
array-cgh	105
language-development	105
aripiprazole	104
fragile x	104
insomnia	104
involvement	104
pyramidal neurons	104
1st year	103
antiepileptic drugs	103
competence	103
coordination	103
psychiatric comorbidity	103
social support	103
stem-cells	103
zebrafish	103
16p11.2	102
autistic-children	102
caregivers	102
developmental coordination disorder	102
dna	102
facial expression	102
nucleus-accumbens	102
conduct disorder	101
linkage disequilibrium	101
messenger-rnas	101
neurite outgrowth	101
orbitofrontal cortex	101
plasma oxytocin	101
resting-state fmri	101
social responsiveness scale	101
antipsychotics	100
mortality	100
seizure	100
susceptibility gene	100
anorexia nervosa	99
comparative genomic hybridization	99
deletion syndrome	99
duplications	99
inflammatory-bowel-disease	99
neural mechanisms	99
nutrition	99
pediatric	99
positron-emission-tomography	99
surface-based analysis	99
cntnap2	98
human genome	98
parkinson's disease	98
rat model	98
eating-disorders	97
pten	97
toxicity	97
ube3a	97
weak central coherence	97
brain networks	96
damage	96
food selectivity	96
social anxiety	96
brain activity	95
candidate gene	95
dentate gyrus	95
mismatch negativity	95
neurotoxicity	95
transition	95
working memory	95
dendritic spine	94
diet	94
necrosis-factor-alpha	94
prenatal	94
probiotics	94
response-inhibition	94
systems	94
trajectories	94
cerebral-blood-flow	93
copy number variations	93
delay	93
fmr1 knockout mice	93
glutathione	93
guidelines	93
mild cognitive impairment	93
serotonin transporter gene	93
strategies	93
transcription factor	93
attachment	92
child development	92
community	92
developmental disorder	92
perinatal risk-factors	92
synchronization	92
technology	92
aging	91
atypical antipsychotics	91
default mode	91
discovery	91
morphology	91
rehabilitation	91
resource	91
school-age-children	91
social	91
traumatic brain-injury	91
early-childhood	90
iq	90
needs	90
nmda receptors	90
normal adults	90
social-skills	90
asymmetry	89
diffusion	89
eye-movements	89
fathers	89
folate	89
frontal-lobe	89
parvalbumin	89
proliferation	89
segmentation	89
trafficking	89
awareness	88
context	88
exercise	88
metabotropic glutamate receptors	88
neuropathology	88
preterm infants	88
reelin	88
release	88
signaling pathway	88
stimulation	88
symptom severity	88
employment	87
fetal-brain	87
lipid-peroxidation	87
multisensory integration	87
preschool	87
recommendations	87
vitamin d	87
cerebellar	86
cerebral cortex	86
gray-matter	86
ketogenic diet	86
lesions	86
proximal 15q	86
scaffolding protein shank3	86
chromosome	85
corpus callosum	85
genotype	85
immune-response	85
neural systems	85
pharmacotherapy	85
synaptogenesis	85
williams syndrome	85
cognitive function	84
common variants	84
docosahexaenoic acid	84
eating disorders	84
empathy quotient	84
haploinsufficiency	84
microdeletion syndrome	84
neocortex	84
neurexin	84
psychopharmacology	84
subtypes	84
t-cells	84
temperament	84
vision	84
longitudinal	83
pathogenesis	83
quotient aq	83
weight	83
childhood-onset schizophrenia	82
covid-19	82
diseases	82
fetal	82
fluoxetine	82
histone deacetylase	82
linkage-disequilibrium	82
macrocephaly	82
maternal-behavior	82
movements	82
negative symptoms	82
polyunsaturated fatty-acids	82
postsynaptic density proteins	82
prevention	82
selection	82
tractography	82
typical development	82
asperger	81
cell-adhesion molecule	81
cognitive flexibility	81
encephalopathy	81
facial emotion recognition	81
high-functioning children	81
mental disorders	81
mentalizing	81
neuropeptides	81
purkinje-cells	81
tourette-syndrome	81
balance	80
behaviour	80
cardio-facial syndrome	80
cognitive deficits	80
difficulties	80
fixation	80
genome-wide	80
haloperidol	80
hypothesis	80
mood disorders	80
nitric-oxide	80
particulate matter	80
pathophysiology	80
prenatal infection	80
receptor gene oxtr	80
social deficits	80
alpha-neurexins	79
difficulties questionnaire	79
environmental enrichment	79
gamma-aminobutyric-acid	79
messenger-rna expression	79
number	79
others	79
phelan-mcdermid syndrome	79
prenatal stress	79
school-aged children	79
developmental trajectories	78
genetic	78
immune system	78
induction	78
inhibitory synapses	78
microduplication	78
nf-kappa-b	78
parental age	78
pituitary-adrenal axis	78
prosody	78
rates	78
virtual reality	78
adjustment	77
alpha	77
antidepressants	77
asthma	77
auditory	77
catatonia	77
human amygdala	77
neuroligins	77
neurological disorders	77
outcome	77
protein-synthesis	77
22q11.2 deletion syndrome	76
fusiform gyrus	76
hippocampal	76
lateralization	76
maternal infection	76
metabolomics	76
microrna	76
neural-tube defects	76
overweight	76
prader-willi	76
profile	76
propionic-acid	76
revised version	76
cell-adhesion	75
high-functioning adults	75
rapamycin	75
schizophrenic-patients	75
stereotypy	75
transporter	75
ultrasonic vocalization	75
alternative medicine	74
behavioral intervention	74
defects	74
dsm-5	74
family-based association	74
foxp2	74
in-utero	74
inhibitory control	74
language development	74
meg	74
neural development	74
object recognition	74
adaptive-behavior	73
asperger's disorder	73
disturbances	73
down-regulation	73
kinase	73
oxytocin receptor	73
perspective	73
preference	73
social-perception	73
spatial attention	73
strengths	73
whole-blood serotonin	73
x-chromosome	73
brain potentials	72
cgg repeat	72
copy number	72
lead	72
long-term	72
markers	72
mental states	72
neuronal differentiation	72
resting-state networks	72
visual-search	72
aspergers-disorder	71
attribution	71
born	71
cortical activation	71
environmental-factors	71
frontotemporal dementia	71
genomics	71
human	71
motivation	71
resting state	71
somatosensory cortex	71
synapse formation	71
ampa receptors	70
birth-weight	70
identity	70
prader-willi syndrome	70
regions	70
specificity	70
thickness	70
underconnectivity	70
adulthood	69
air-pollution	69
brain structure	69
dsm-iv	69
gabaergic interneurons	69
genetic risk	69
individual differences	69
social recognition	69
synaptic function	69
attention-deficit hyperactivity disorder	68
behavioral-phenotype	68
cytokine	68
excitation/inhibition	68
family history	68
heart-rate-variability	68
immune	68
twins	68
vitamin-d	68
excitability	67
eye contact	67
mirror-neuron system	67
recognition memory	67
severe myoclonic epilepsy	67
structural connectivity	67
temporal-lobe	67
linkage analysis	66
psd-95	66
speech-perception	66
aggressive-behavior	65
behavioral phenotypes	65
sensory	65
zinc	65
aged 8 years	64
cingulate cortex	64
comorbidities	64
developmental neurotoxicity	64
differential expression	64
independent component analysis	64
ocd	64
physical activity	64
synaptic transmission	64
synchrony	64
ubiquitin ligase	64
addiction	63
air pollution	63
arginine-vasopressin	63
episodic memory	63
gwas	63
multiple sclerosis	63
relevant	63
resting-state	63
social perception	63
specific language impairment	63
1st-degree relatives	62
arousal	62
social approach	62
valproate	62
electrophysiology	61
genomewide screen	61
impulsivity	61
inbred strains	61
maternal depression	61
receptor subunit genes	61
social motivation	61
state functional connectivity	61
tsc1	61
broader autism phenotype	60
disruptive behavior disorders	60
glia	60
neuron	60
platelet serotonin	60
brain volume	59
executive dysfunction	59
homeobox-transcription-factor	59
motor control	59
oxtr	59
self-report	59
depressive symptoms	58
salivary cortisol	58
sustained attention	58
nmda	57
dti	56

## Sheet: keywords related to etiology
prenatal exposure		gene		Structural and functional factors of brain		Immune inflammation		Neurons and related neurotransmitters		Metabolism and nutrition		Environmental and social psychological		Others
maternal-behavior	82	mutations	1407	brain-stem	108	oxidative stress	817	neurons	617	metabolomics	76	stress	782	testosterone	128
prenatal stress	79	gene	1377	functional connectivity	725	inflammation	507	gamma-aminobutyric-acid	79	metabolism	275	facial emotion recognition	81	multisensory integration	87
pregnancy	732	de-novo mutations	934	corpus-callosum	398	maternal immune activation	253	synaptic plasticity	733	nutrition	99	mentalizing	81	pituitary-adrenal axis	78
prenatal exposure	446	genetics	840	brain	3322	neuroinflammation	244	serotonin	491	folate	89	cognitive deficits	80	cytokine	68
in-utero exposure	113	genes	663	prefrontal cortex	849	antibodies	145	receptor	385	vitamin d	87	social motivation	61	arginine-vasopressin	63
perinatal risk-factors	92	gene-expression	654	cortex	778	autoantibodies	144	vasopressin	327	docosahexaenoic acid	84	executive dysfunction	59	salivary cortisol	58
parental age	78	variants	589	amygdala	635	autoimmune-diseases	125	dopamine	294	eating disorders	84	social brain	119		482
maternal infection	76	genome-wide association	490	neurodevelopment	593	immunization	124	gaba	291	polyunsaturated fatty-acids	82	cognitive function	84
in-utero	74	copy number variation	419	hippocampus	497	apoptosis	117	event-related potentials	284	vitamin-d	68	epigenetics	281
	1690	mental-retardation protein	397	cerebellum	473	immune activation	111	synapse	255	mitochondrial dysfunction	210	environment	169
		dna methylation	392	brain-development	471	immune-response	85	glutamate	234	zinc	65	environmental-factors	71
		linkage	368	white-matter	428	prenatal infection	80	microglia	234	gut microbiota	304	air-pollution	69
		messenger-rna	346	human brain	373	genetic	78	neuroimaging	228	microbiota	189	air pollution	63
		copy-number variation	311	central-nervous-system	322	immune	68	nervous-system	213	intestinal microbiota	130		2000
		mutation	294	cerebral-cortex	296	nitric-oxide	80	dendritic spines	211	microbiome	130
		mecp2	278	basal ganglia	264	immune system	78	neurogenesis	207	gut-brain axis	112
		shank3	229	frontal-cortex	241	nf-kappa-b	78	synaptic-transmission	186	mitochondria	136
		microdeletion	222	medial prefrontal cortex	237	t-cells	84	serotonin transporter	167		2220
		heritability	210	superior temporal sulcus	191		3218	neural basis	154
		genome	197	brain development	188			cortisol	130
		deletions	180	cortical thickness	184			nmda receptor	130
		de-novo	177	anterior cingulate cortex	173			neuronal migration	128
		transcription	175	mirror neuron system	167			synapses	120
		fmrp	170	structural variation	160			hippocampal-neurons	118
		copy number variants	157	dorsolateral prefrontal cortex	156			mirror neurons	118
		fmr1	152	default mode network	153			microglial activation	116
		gene expression	151	brain connectivity	147			gaba(a) receptor	114
		loci	150	neuroanatomy	142			postsynaptic density	114
		candidate genes	136	visual-cortex	127			neurodegeneration	112
		cpg-binding protein-2	132	human cerebral-cortex	125			interneurons	110
		array-cgh	105	white matter	124			astrocytes	109
		16p11.2	102	cortical development	118			neural circuitry	109
		dna	102	blood-brain-barrier	113			pyramidal neurons	104
		messenger-rnas	101	striatum	106			neurite outgrowth	101
		susceptibility gene	100	nucleus-accumbens	102			plasma oxytocin	101
		comparative genomic hybridization	99	orbitofrontal cortex	101			neurotoxicity	95
		cntnap2	98	weak central coherence	97			dendritic spine	94
		human genome	98	brain networks	96			glutathione	93
		pten	97	brain activity	95			nmda receptors	90
		candidate gene	95	dentate gyrus	95			parvalbumin	89
		copy number variations	93	cerebral-blood-flow	93			metabotropic glutamate receptors	88
		serotonin transporter gene	93	default mode	91			neural systems	85
		transcription factor	93	traumatic brain-injury	91			synaptogenesis	85
		proximal 15q	86	frontal-lobe	89			postsynaptic density proteins	82
		scaffolding protein shank3	86	fetal-brain	87			neuropeptides	81
		chromosome	85	cerebellar	86			receptor gene oxtr	80
		genotype	85	cerebral cortex	86			environmental enrichment	79
		common variants	84	gray-matter	86			inhibitory synapses	78
		haploinsufficiency	84	corpus callosum	85			inhibitory control	74
		microdeletion syndrome	84	neocortex	84			neural development	74
		linkage-disequilibrium	82	human amygdala	77			neuronal differentiation	72
		genome-wide	80	fusiform gyrus	76			synapse formation	71
		22q11.2 deletion syndrome	76	hippocampal	76			gabaergic interneurons	69
		microrna	76	cortical activation	71			synaptic function	69
		foxp2	74	thickness	70			excitation/inhibition	68
		x-chromosome	73	underconnectivity	70			excitability	67
		copy number	72	brain structure	69			mirror-neuron system	67
		genomics	71	structural connectivity	67			psd-95	66
		genetic risk	69	temporal-lobe	67			developmental neurotoxicity	64
		receptor subunit genes	61	cingulate cortex	64			synaptic transmission	64
		tsc1	61	state functional connectivity	61			glia	60
		homeobox-transcription-factor	59	brain volume	59			neuron	60
		oxtr	59		14444			nmda	57
		transcriptome	111						8849
		genomic screen	110
		microarray	110
		chromatin	108
		ube3a	97
		chromosomal microarray	107
			14980
			30603

## Sheet: references
Ranking	Name	Year	Journal	Citation	Impact Factor
1	The brain's default network - Anatomy, function, and relevance to disease	2008	YEAR IN COGNITIVE NEUROSCIENCE 2008	6542	5.691
2	User-guided 3D active contour segmentation of anatomical structures: Significantly improved efficiency and reliability	2006	NEUROIMAGE	4089	6.556
3	Dynamic mapping of human cortical development during childhood through early adulthood	2004	PROCEEDINGS OF THE NATIONAL ACADEMY OF SCIENCES OF THE UNITED STATES OF AMERICA	3422	11.205
4	Rett syndrome is caused by mutations in X-linked MECP2, encoding methyl-CpG-binding protein 2	1999	NATURE GENETICS	3341	38.33
5	A general framework for estimating the relative pathogenicity of human genetic variants	2014	NATURE GENETICS	3213	38.33
6	Global burden of disease attributable to mental and substance use disorders: findings from the Global Burden of Disease Study 2010	2013	LANCET	3178	79.323
7	Understanding and sharing intentions: The origins of cultural cognition	2005	BEHAVIORAL AND BRAIN SCIENCES	2168	12.579
8	Removing electroencephalographic artifacts by blind source separation	2000	PSYCHOPHYSIOLOGY	2105	4.016
9	Empathy: Its ultimate and proximate bases	2002	BEHAVIORAL AND BRAIN SCIENCES	2096	12.579
10	Prevalence of Autism Spectrum Disorder Among Children Aged 8 Years - Autism and Developmental Disabilities Monitoring Network, 11 Sites, United States, 2014	2018	MMWR SURVEILLANCE SUMMARIES	1919	58.769
11	Strong association of de novo copy number mutations with autism	2007	SCIENCE	1894	47.728
12	Critical periods of vulnerability for the developing nervous system: Evidence from humans and animal models	2000	ENVIRONMENTAL HEALTH PERSPECTIVES	1869	9.031
13	Identification of risk loci with shared effects on five major psychiatric disorders: a genome-wide analysis	2013	LANCET	1836	79.323
14	Psychiatric disorders in children with autism spectrum disorders: Prevalence, comorbidity, and associated factors in a population-derived sample	2008	JOURNAL OF THE AMERICAN ACADEMY OF CHILD AND ADOLESCENT PSYCHIATRY	1810	8.829
15	Microbiota Modulate Behavioral and Physiological Abnormalities Associated with Neurodevelopmental Disorders	2013	CELL	1672	41.584
16	Large-scale brain networks and psychopathology: a unifying triple network model	2011	TRENDS IN COGNITIVE SCIENCES	1652	20.229
17	Building blocks of social cognition: Mirror, mentalize, share?	2019	CORTEX	1626	4.027
18	Consensus Statement: Chromosomal Microarray Is a First-Tier Clinical Diagnostic Test for Individuals with Developmental Disabilities or Congenital Anomalies	2010	AMERICAN JOURNAL OF HUMAN GENETICS	1598	11.025
19	Parvalbumin neurons and gamma rhythms enhance cortical circuit performance	2009	NATURE	1559	49.962
20	Model of autism: increased ratio of excitation/inhibition in key neural systems	2003	GENES BRAIN AND BEHAVIOR	1494	3.449
